# Supplementary material for: Effect of salt stress in urban conditions on two Acer species with different sensitivity
Source: PeerJ. 2021 Jan 28;9:e10577. doi: 10.7717/peerj.10577 (PMC7847709; doi:10.7717/peerj.10577)
Supplement: Supplemental Information 1 [file peerj-09-10577-s001.xls]

## Sheet: pot_experiment_data
Species	dose (g/pot)	Cl (%)	Na (%)	N (%)	S (%)	P (%)	K (%)	Mg (%)	Ca (%)	(RCOO-/sum anions)	sum of polyprenols (mg/g)
Acer platanoides	0	0.21	17.1948	1.69	0.181449	0.255983	0.98256	0.167035	0.712356	5.14146	6.8435
Acer platanoides	0	0.17	26.637	1.51	0.185963	0.280252	0.823324	0.164665	0.726463	5.23696	7.18331
Acer platanoides	0	0.17	17.3697	1.66	0.169364	0.249122	1.01737	0.171216	0.768486	6.7927	8.54734
Acer platanoides	0	0.13	21.5497	1.64	0.163262	0.217581	0.969735	0.122115	0.530993	5.75792	7.37537
Acer platanoides	0	0.2	21.9256	1.53	0.17339	0.250734	0.828299	0.16566	0.730852	4.93121	4.63435
Acer platanoides	0	0.19	22.2717	1.58	0.162338	0.29	0.915615	0.212819	0.841376	6.19745	5.60066
Acer platanoides	0	0.17	25.2	1.62	0.175	0.27	0.9	0.19	0.7	5.84	7.01
Acer platanoides	0	0.19	17.2	1.58	0.171	0.25	0.94	0.15	0.74	5.24	6.43
Acer platanoides	10	0.32	30.7401	1.76	0.188964	0.18568	0.803973	0.170253	0.662095	4.13191	5.89042
Acer platanoides	10	0.32	39.7006	1.34	0.165026	0.32437	0.985028	0.157604	0.763396	4.20776	4.82751
Acer platanoides	10	0.45	29.4942	1.76	0.17977	0.247396	1.30266	0.12535	0.63904	3.09939	7.04425
Acer platanoides	10	0.42	37.1124	1.34	0.153442	0.311558	1.0023	0.19557	0.684496	3.2598	3.76369
Acer platanoides	10	0.39	41.423	1.24	0.140525	0.249859	0.950292	0.177875	0.82846	3.59706	5.69344
Acer platanoides	10	0.44	29.1904	1.41	0.144871	0.24583	0.788994	0.209576	1.06021	4.0154	4.5265
Acer platanoides	10	0.37	32.6	1.52	0.158	0.24	1.01	0.14	0.77	3.51	5.34
Acer platanoides	10	0.41	36.6	1.44	0.166	0.28	0.94	0.21	0.76	3.92	4.99
Acer platanoides	20	1.1	183.766	1.66	0.180444	0.358291	1.12214	0.201985	0.797965	1.29336	5.40649
Acer platanoides	20	0.75	162	1.34	0.146716	0.249377	1.01636	0.173525	0.768468	2.03467	4.62459
Acer platanoides	20	0.78	134.695	1.54	0.173307	0.357032	0.941713	0.210646	0.817803	2.50183	5.80088
Acer platanoides	20	1	154	1.34	0.140525	0.294753	0.920989	0.162385	1.01794	2.13	6.02519
Acer platanoides	20	0.81	183	1.71	0.185969	0.34291	1.03654	0.183203	0.72317	2.13545	4.79157
Acer platanoides	20	1.05	184.095	1.71	0.15774	0.248682	1.3476	0.197194	0.673955	1.04	4.50413
Acer platanoides	20	0.81	154	1.5	0.16	0.3	1	0.18	0.85	1.88	5.26
Acer platanoides	20	0.73	174	1.6	0.168	0.31	0.98	0.19	0.75	1.84	4.9
Acer platanoides	30	1	1104.79	1.69	0.172425	0.279357	1.34489	0.199243	0.722255	1.70701	5.98231
Acer platanoides	30	1.16	1224.88	1.94	0.193127	0.295858	1.4184	0.204051	0.87095	1.60623	7.21255
Acer platanoides	30	1.26	1523	1.59	0.180189	0.318696	1.27736	0.209494	1.08161	1.39725	4.35773
Acer platanoides	30	1.11	1139.03	1.48	0.152063	0.21754	1.36551	0.201102	0.682755	1.53355	4.66837
Acer platanoides	30	1.09	1285.28	1.21	0.141617	0.248305	1.00088	0.1245	0.683527	1.18958	3.99667
Acer platanoides	30	1.3	1191	1.81	0.180672	0.358139	1.36986	0.156986	0.784929	1.77442	7.58614
Acer platanoides	30	1.18	1286	1.72	0.171	0.28	0.92	0.16	0.86	1.42	5.94
Acer platanoides	30	1.12	1377	1.52	0.169	0.3	0.87	0.2	0.74	1.64	5.5
Acer platanoides	40	1.15	2189	1.51	0.15406	0.217683	1.17763	0.225711	0.564279	1.46152	3.5014
Acer platanoides	40	1.42	2457.87	1.5	0.149325	0.295887	1.36213	0.188221	0.767745	1.20939	3.68339
Acer platanoides	40	1.24	1573.34	1.53	0.17339	0.294038	1.25289	0.149383	0.830069	1.64153	5.26566
Acer platanoides	40	1.51	2238.02	1.42	0.145899	0.217078	0.92159	0.154429	0.623433	0.98	3.6075
Acer platanoides	40	1.41	2149	1.8	0.166042	0.248274	1.4115	0.160549	0.744598	0.89	2.30142
Acer platanoides	40	1.11	1355.62	1.58	0.160255	0.280549	1.26828	0.179051	0.621705	1.41	4.52486
Acer platanoides	40	1.27	2094	1.66	0.168	0.27	1.27	0.16	0.74	1.25	4.16
Acer platanoides	40	1.35	1894	1.46	0.165	0.25	1.26	0.2	0.75	1.29	4.37
Acer campestre	0	0.1	28.7924	1.48	0.160189	0.28	0.731886	0.139058	0.414735	5.13933	5.25104
Acer campestre	0	0.06	19.8857	1.44	0.143487	0.29	0.447427	0.161571	0.521999	6.09213	5.80031
Acer campestre	0	0.08	29.6633	2.07	0.180459	0.310397	0.86518	0.197755	0.494389	5.57682	5.32911
Acer campestre	0	0.08	22.1272	1.6	0.164393	0.279764	0.639229	0.140139	0.442543	4.91407	5.98578
Acer campestre	0	0.08	30	1.45	0.153756	0.248781	0.744405	0.182467	0.456248	5.56326	5.28011
Acer campestre	0	0.06	18.4	1.39	0.153389	0.217933	0.472237	0.139186	0.472237	5.68321	6.26877
Acer campestre	0	0.1	20.8	1.56	0.164	0.25	0.6	0.17	0.57	5.6	5.9
Acer campestre	0	0.06	28.8	1.46	0.162	0.28	0.7	0.16	0.6	5.4	5.28
Acer campestre	10	0.15	64.3341	1.21	0.163452	0.280248	0.515262	0.164393	0.52753	5.99692	5.86854
Acer campestre	10	0.15	46.7	1.44	0.143352	0.279566	0.698156	0.173335	0.625933	5.384	6.99118
Acer campestre	10	0.16	46.2783	1.79	0.176203	0.280633	0.779423	0.185113	0.608924	3.91901	4.24668
Acer campestre	10	0.23	64.3	1.76	0.180832	0.280388	0.589681	0.22113	0.933661	5.21007	5.52316
Acer campestre	10	0.21	46.9868	2.27	0.182094	0.33244	0.666864	0.170421	0.815056	4.3323	3.87043
Acer campestre	10	0.23	59.6	2.12	0.18819	0.278652	0.694755	0.181132	0.645129	3.99959	4.70482
Acer campestre	10	0.17	50.7	1.72	0.165	0.25	0.63	0.21	0.7	4.80698	5.3
Acer campestre	10	0.21	58.7	1.81	0.163	0.33	0.69	0.16	0.68	4.78	5.11
Acer campestre	20	0.29	138	2.08	0.182122	0.388117	0.576535	0.221843	0.984914	4.35	8.17451
Acer campestre	20	0.26	145.435	2.01	0.1821	0.311542	0.813449	0.209525	0.714849	4.59611	7.84154
Acer campestre	20	0.27	131.8	1.94	0.17202	0.280095	0.819102	0.183678	0.719817	4.01568	7.35784
Acer campestre	20	0.27	158.9	1.44	0.177954	0.187275	0.594265	0.14609	0.619026	3.72904	4.54017
Acer campestre	20	0.31	164.4	1.68	0.164973	0.24837	0.730069	0.150881	0.511048	3.13761	8.92121
Acer campestre	20	0.35	138.342	1.96	0.182864	0.29595	0.846951	0.231666	0.597848	3.07	4.51323
Acer campestre	20	0.27	136.2	1.82	0.17	0.3	0.75	0.18	0.66	3.91	6.69
Acer campestre	20	0.26	156.2	1.88	0.168	0.28	0.71	0.18	0.72	3.73	7.17
Acer campestre	30	0.45	418.965	2.4	0.182249	0.326529	0.803663	0.170474	0.511422	2.52869	9.36373
Acer campestre	30	0.58	338.445	2.06	0.182151	0.253756	0.961123	0.168196	0.648758	2.15399	4.03877
Acer campestre	30	0.64	407.873	1.66	0.188122	0.308102	1.0112	0.251566	0.76187	1.88278	4.04745
Acer campestre	30	0.46	401	1.66	0.170558	0.279729	0.714532	0.150298	0.566698	2.8823	7.38842
Acer campestre	30	0.54	290	1.58	0.155748	0.279524	0.781441	0.144078	0.512821	1.78146	7.27551
Acer campestre	30	0.44	310.019	1.53	0.145816	0.212044	1.05129	0.161361	0.660114	3.27212	4.91164
Acer campestre	30	0.48	320.8	1.8	0.17	0.31	0.8	0.16	0.57	2.62	6.38
Acer campestre	30	0.56	400.8	1.84	0.172	0.25	0.81	0.18	0.65	2.22	5.95
Acer campestre	40	0.52	1102	1.77	0.170587	0.295159	0.764111	0.214304	0.616219	2.69421	4.51019
Acer campestre	40	0.79	1449	2.09	0.192081	0.327912	1.00151	0.234272	0.732815	1.57617	4.23895
Acer campestre	40	0.75	1429	1.78	0.191202	0.294899	0.868228	0.1538	0.49613	1.42288	7.13089
Acer campestre	40	0.56	1267.33	1.11	0.144047	0.26	0.891089	0.15	0.470297	2.31903	4.25762
Acer campestre	40	0.58	1137	1.8	0.166042	0.29	0.698829	0.19519	0.698829	2.27361	6.20981
Acer campestre	40	0.56	1111.18	1.71	0.178	0.23	1.16555	0.194598	0.419489	2.49407	5.83089
Acer campestre	40	0.53	1449.3	1.7	0.17	0.3	0.93	0.18	0.58	2.13	5.54
Acer campestre	40	0.72	1049.3	1.72	0.176	0.26	0.94	0.19	0.56	2.18	5.2

## Sheet: field_experiment_data
Species	Location	Cl (%)	Na (%)	N (%)	S (%)	P (%)	K (%)	Mg (%)	Ca (%)	(RCOO-/Sum anions)	sum of polyprenols (mg/g)
Acer campestre	street	0.37	36.7176	1.46	0.156754	0.155403	1.07886	0.118285	1.61035	5.87	6.02212
Acer campestre	street	0.513	55.8245	1.46	0.179805	0.154751	0.768126	0.135856	1.41275	5.24826	6.09419
Acer campestre	street	0.316	25.9883	1.72	0.175486	0.155676	0.724674	0.122445	1.24953	5.55942	7.33574
Acer campestre	street	0.459	25.3535	1.86	0.185163	0.124875	0.926377	0.131643	1.37016	4.82617	6.12993
Acer campestre	street	0.37	27.5421	1.6	0.181323	0.186576	1.07196	0.0942881	1.64063	5.41203	4.88148
Acer campestre	street	0.53	12.4829	1.75	0.179805	0.155112	0.936381	0.163991	1.51752	4.71302	5.49373
Acer campestre	street	0.455	48.2212	1.7	0.156818	0.156121	0.921774	0.119581	1.19581	5.39194	5.29336
Acer campestre	street	0.405	101.783	1.9	0.168661	0.186928	0.847827	0.0968945	1.43851	5.17339	3.67951
Acer campestre	park	0.29	25.4174	2.68	0.211152	0.16468	1.09644	0.231747	1.66957	8.12305	4.33298
Acer campestre	park	0.27	23.9174	2.28	0.194918	0.154238	1.30574	0.219748	1.39174	8.3032	6.76941
Acer campestre	park	0.33	37.7066	2.7	0.245353	0.155245	1.17365	0.274684	1.54822	7.05732	1.2761
Acer campestre	park	0.27	27.711	2.45	0.20509	0.186972	1.0477	0.207045	1.82099	8.0726	1.30851
Acer campestre	park	0.31	43.8401	2.45	0.189363	0.155657	1.08981	0.178333	1.90717	8.36522	1.38301
Acer campestre	park	0.23	30.9794	2.37	0.215465	0.186229	1.08599	0.153026	1.85112	7.44759	4.13086
Acer campestre	park	0.33	36.9531	2.28	0.1824	0.155888	0.985416	0.197083	1.52739	7.04546	3.20792
Acer campestre	park	0.52	40.4286	2.73	0.206684	0.187439	1.09132	0.228186	1.48817	7.51561	6.97842
Acer campestre	control	0.29	33.5204	2.51	0.197758	0.38	0.951452	0.239083	1.48817	7.62809	3.08892
Acer campestre	control	0.18	19.6444	2.53	0.21629	0.308966	1.07569	0.205359	1.17348	7.19146	0.051111
Acer campestre	control	0.21	25.728	2.48	0.215361	0.227467	1.04707	0.139609	0.972278	7.92508	0.218297
Acer campestre	control	0.25	18.0673	2.27	0.190023	0.186609	0.719567	0.394521	1.5632	9.16894	0.093447
Acer campestre	control	0.18	26.2969	2.31	0.188542	0.29	1.16527	0.240492	1.56196	8.45169	0.0364
Acer campestre	control	0.28	26.3176	2.38	0.216416	0.479026	1.54892	0.237334	1.54892	7.00135	0.144398
Acer campestre	control	0.16	25.7991	2.2	0.186	0.266348	1.19302	0.19138	1.24273	8.88039	0.070241
Acer campestre	control	0.19	37.7753	2.18	0.195045	0.435139	1.40235	0.233725	1.52537	8.58198	0.519084
Acer platanoides	street	1.59	80.8692	2.04	0.175364	0.154722	1.41397	0.245584	1.78607	1.99522	1.41438
Acer platanoides	street	1.41	117.7	2.3	0.201741	0.185954	1.03478	0.102357	1.84881	1.85728	0.7
Acer platanoides	street	1.61	72.3853	2.3	0.204075	0.218512	1.2818	0.103408	1.81249	1.81322	1.48
Acer platanoides	street	1.4	99.3457	1.97	0.192056	0.186537	1.36626	0.110267	1.24969	1.91666	0.828762
Acer platanoides	street	1.27	74.2393	1.98	0.190828	0.342078	1.35	0.235232	1.92075	2.85353	1.40331
Acer platanoides	street	1.37	82.3853	2.07	0.192	0.25	1.31	0.09	1.77	1.69266	1.35
Acer platanoides	street	1.49	107.7	2.2	0.185	0.23	1.13	0.14	1.49	1.93809	1.3
Acer platanoides	street	1.32	72.9021	2.08	0.198667	0.185839	1.15	0.154714	1.42237	2.58217	2.09729
Acer platanoides	park	0.5	43.9048	2.33	0.226526	0.158698	0.784891	0.208487	1.88864	6.44308	1.41438
Acer platanoides	park	0.39	26.6746	2.62	0.223984	0.17369	1.08674	0.249457	1.33373	5.68817	0.743053
Acer platanoides	park	0.42	28.0433	2.42	0.219909	0.155841	1.09735	0.180453	1.7705	7.63682	0.620605
Acer platanoides	park	1.04	49.7048	2.87	0.240249	0.326484	1.0221	0.179591	1.89431	6.0208	0.314211
Acer platanoides	park	0.32	33.4898	2.33	0.180088	0.154971	1.05114	0.185783	1.58893	7.03869	2.08869
Acer platanoides	park	0.61	43.3555	2.73	0.259712	0.187299	1.1644	0.227926	1.43692	7.065	4.12481
Acer platanoides	park	0.31	28.6246	2.51	0.2008	0.186023	1.24774	0.200617	1.66365	6.15053	0.76707
Acer platanoides	park	0.19	35.8065	2.43	0.183972	0.186741	1.04218	0.138958	1.43921	6.08492	0.269971
Acer platanoides	control	0.32	23.1553	2.52	0.216837	0.31597	1.41481	0.305302	1.36231	8.15237	0.029015
Acer platanoides	control	0.27	29.718	1.95	0.153494	0.275686	1.44906	0.169467	1.4245	7.53679	0.23
Acer platanoides	control	0.21	24.721	1.54	0.147583	0.26	1.32172	0.193362	1.56648	7.50974	0.067497
Acer platanoides	control	0.29	32.3974	2.07	0.172897	0.276135	1.34989	0.255252	1.33894	7.54975	1.02779
Acer platanoides	control	0.23	30.9752	1.87	0.214737	0.36224	0.924261	0.207334	1.64868	7.91622	0.233679
Acer platanoides	control	0.25	19.0878	1.59	0.19985	0.337891	1.21468	0.252851	1.43441	7.44572	0.104831
Acer platanoides	control	0.27	28.7069	1.92	0.186325	0.357807	1.09835	0.259611	1.67249	7.8849	0.110363
Acer platanoides	control	0.23	43.6736	1.82	0.1579	0.302561	1.22286	0.222111	1.14729	7.44572	0.057535
